# Supplementary material
Source: publisher figshare collection journal article supplement (https://acs.figshare.com/ndownloader/files/15112658)
Supplement: Supplementary file 1 [file 15112658]

## A subset of new platinum antitumor agents kills cells by a multimodal mechanism of action also involving changes in the organization of the microtubule cytoskeleton

*Hana. Kostrhunova,<sup>†</sup> Juraj. Zajac,<sup>†</sup> Vojtech Novohradsky,<sup>†</sup> Jana. Kasparkova,<sup>†</sup> Jaroslav Malina,<sup>†</sup> Janice. R. Aldrich-Wright,<sup>‡</sup> Emanuele. Petruzzella,<sup>§</sup> Roman Sirota,<sup>§</sup> Dan Gibson,<sup>§</sup> and Viktor Brabec<sup>\*,†</sup>*

<sup>†</sup>Czech Academy of Sciences, Institute of Biophysics, Kralovopolska 135, CZ-61265 Brno, Czech Republic

<sup>‡</sup>School of Science and Health, Western Sydney University, Penrith South DC 1797, NSW, Australia

<sup>§</sup>Institute for Drug Research, School of Pharmacy, The Hebrew University, Jerusalem, 91120, Israel

### Table of Contents

|                                                                                                                                                                        |    |
|------------------------------------------------------------------------------------------------------------------------------------------------------------------------|----|
| <b>Table S1.</b> DNA platination in MDA-MB-231 cells treated with the investigated platinum complexes                                                                  | S2 |
| <b>Figure S1.</b> DNA binding of Pt(IV) complexes derived from <b>5</b> and <b>1</b> in the presence or absence of sodium ascorbate                                    | S2 |
| <b>Figure S2.</b> Cell-cycle profiles of MDA-MB-231 cells treated with <b>5</b> and its investigated Pt(IV) derivatives                                                | S3 |
| <b>Figure S3.</b> Cell-cycle profiles of MDA-MB-231 cells treated h with <b>1</b> and its investigated Pt(IV) derivatives                                              | S3 |
| <b>Figure S4.</b> Effects of <b>5</b> and its investigated Pt(IV) derivatives on the organization of the structural network (cytoskeleton) within the cell's cytoplasm | S4 |
| <b>Figure S5.</b> Mitochondrial membrane hypopolarization, HDAC activity and DNA methylation in MDA-MB-231 cells                                                       | S5 |

**Table S1.** DNA platination in MDA-MB-231 cells treated for 6 h at 2.0  $\mu\text{M}$  concentrations

|          | pg Pt/ $\mu\text{g}$ DNA <sup>a</sup> |
|----------|---------------------------------------|
| <b>1</b> | $1.97 \pm 0.08$                       |
| <b>2</b> | $4.5 \pm 0.5$                         |
| <b>3</b> | $5.9 \pm 0.5$                         |
| <b>4</b> | $25 \pm 4$                            |
| <b>5</b> | $0.24 \pm 0.09$                       |
| <b>6</b> | $1.2 \pm 0.1$                         |
| <b>7</b> | $1.67 \pm 0.03$                       |
| <b>8</b> | $7 \pm 1$                             |

<sup>a</sup>All results are expressed as the mean  $\pm$  SD from three independent experiments.

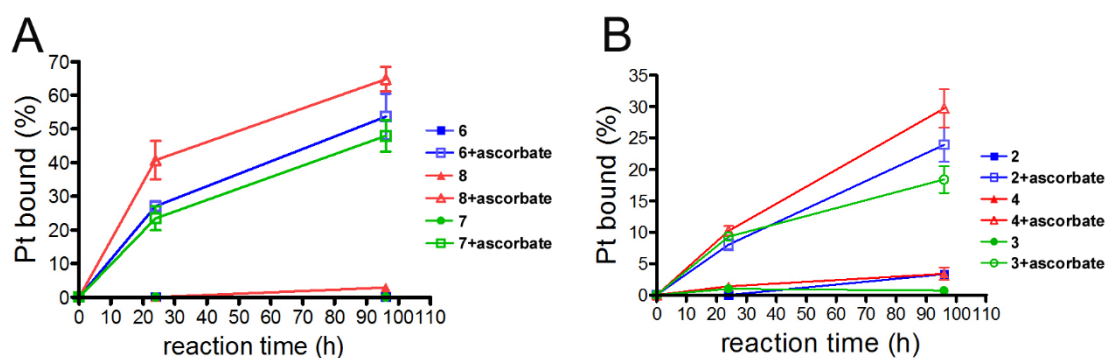

**Figure S1.** DNA binding of Pt(IV) complexes derived from **5** and **1** in the presence (open symbols) or absence (full symbols) of sodium ascorbate. Calf thymus DNA ( $64 \mu\text{g mL}^{-1}$ ) was incubated with  $2 \times 10^{-5}$  M Pt(IV) derivatives of 56-MeSS (A) or OX (B) in 10 mM  $\text{NaClO}_4$  at  $37^\circ\text{C}$  in the presence or absence of  $2 \times 10^{-5}$  M sodium ascorbate.

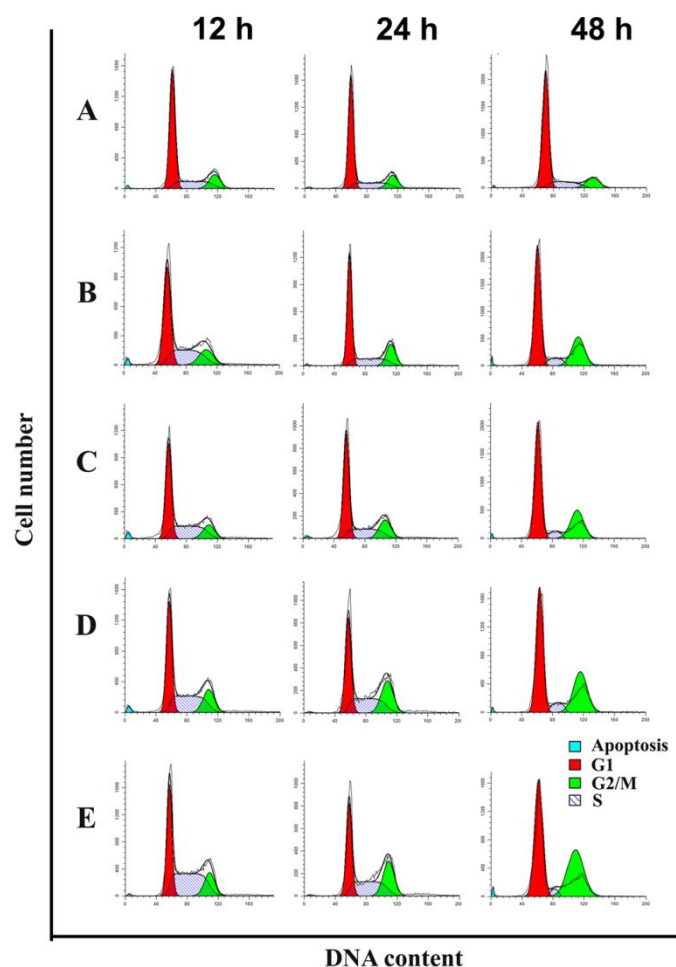

**Figure S2.** Cell-cycle profiles of MDA-MB-231 cells treated for 12, 24 or 48 h with 5 and its investigated Pt(IV) derivatives at the concentrations corresponding to IC<sub>30</sub> values (found for these compounds in MDA-MB-231 cells treated for 72 h). The cells were stained with propidium iodide and assessed for cell-cycle distribution by FACS analysis. The colors represent the G1 phase (red), S phase (blue dashed) and G<sub>2</sub>/M phase (green) of modeled cell cycle. Cells with the lowest DNA content were considered apoptotic (turquoise). A, control; B, 5; C, 6; D, 7, and E, 8.

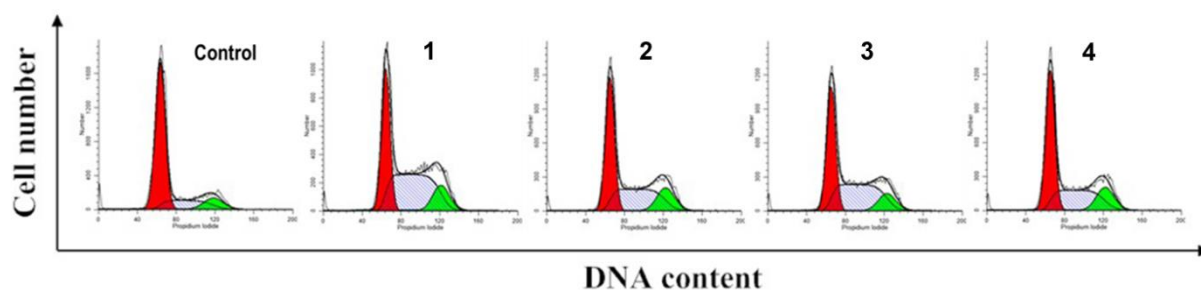

**Figure S3.** Cell-cycle profiles of MDA-MB-231 cells treated for 24 h with 1 and its investigated Pt(IV) derivatives at the concentrations corresponding to IC<sub>30</sub> values (found for these compounds in MDA-MB-231 cells treated for 72 h). The other conditions were the same as specified in the legend to Figure S1. The colors represent the G1 phase (red), S phase (blue dashed) and G<sub>2</sub>/M phase (green) of modeled cell cycle. Cells with the lowest DNA content were considered apoptotic (turquoise).

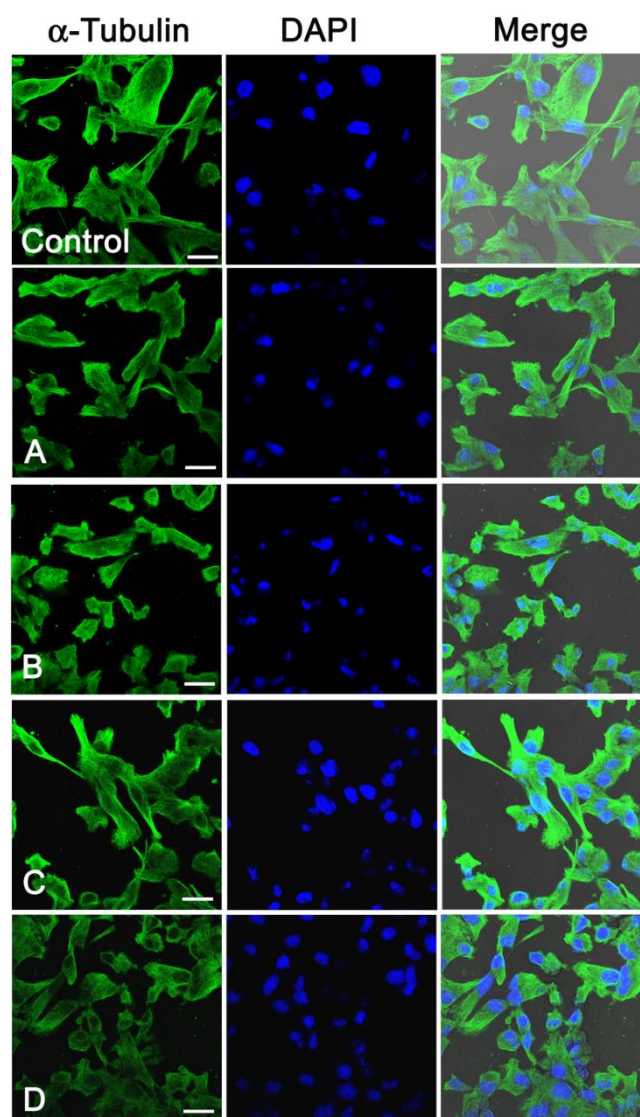

**Figure S4.** Effects of **5** and its investigated Pt(IV) derivatives on the organization of the structural network (cytoskeleton) within the cell's cytoplasm. MDA-MB-231 cells were incubated with the investigated **5** and its investigated Pt(IV) derivatives at the concentrations corresponding to  $IC_{50}$  (72 h; MTT) for 16 h. Images were obtained by confocal microscopy of anti- $\alpha$ -tubulin immunofluorescence (green) preparations; nuclei (DNA) were stained with DAPI (blue). Control cells (top row); cells treated with (A) **5**, (B) **6**, (C) **7**, and (D) **8**. Samples were scanned on confocal laser scanning microscope, and the scale bars are 25  $\mu$ m.

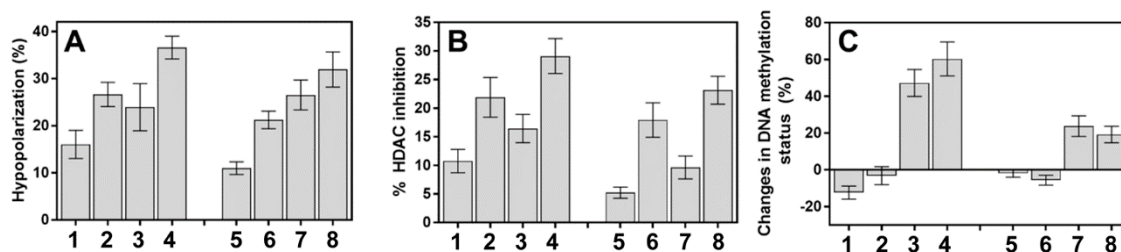

**Figure S5.** A. Mitochondrial membrane hypopolarization (TMRE fluorescence control – TMRE fluorescence sample) of MDA-MB-231 cells treated for 5 h with the investigated platinum complexes at concentrations corresponding to 3-fold  $IC_{50}$  values (determined with MTT; 72 h). After TMRE staining (1 nM; 20 min), the fluorescence (excitation/emission = 560 nm/595 nm) was read on Varian Cary Eclipse. The values are mean  $\pm$  SD from three independent experiments.

B. HDAC activity (% inhibition) in MDA-MB-231 cells treated for 24 h with the investigated platinum compounds at concentrations corresponding to  $IC_{30}$  (determined with MTT assay after 72 h treatment).

C. DNA methylation in MDA-MB-231 cells treated for 24 h with the investigated platinum compounds at concentrations corresponding to  $IC_{30}$  (determined with MTT assay after 72 h treatment).
